# Supplementary material for: Effect of digital based nursing intervention on knowledge of self-care behaviors and self-efficacy of adult clients with diabetes
Source: PubMed Central journal article supplement (PMC10877800; doi:10.1186/s12912-024-01787-2), 2024-02-20
Supplement: 12912_2024_1787_MOESM2_ESM.pdf [file 12912_2024_1787_MOESM2_ESM.pdf]

Code:

Dear Participant,

We invite you to partake in a vital study aimed at understanding the impact of nursing interventions on self-care behaviors and self-efficacy in individuals with diabetes. Your participation will involve completing a brief questionnaire about your socio-demographic background. This information is crucial for our research and will be kept strictly confidential. We appreciate your valuable contribution to this study.

### **Socio-Demographic Data Questionnaire**

#### *Participant Information:*

1. **Age:**

- "Please specify your age in years."

2. **Gender:**

- "Please indicate your gender."
  - Male
  - Female
  - Non-binary
  - Prefer not to disclose.
  - Other (please specify) \_\_\_\_\_

3. **Duration of Diabetes:**

- "For how many years have you been diagnosed with diabetes?"
  - Less than 1 year
  - 1-5 years
  - 6-10 years
  - 11-15 years
  - Over 15 years

*Your responses are confidential and will be used solely for research purposes.*
